# Supplementary material
Source: publisher site journal article supplement (https://www.dovepress.com/article/240707)
Supplement: Supplementary file 1 [file get_supplementary_file.php]

Supplementary data

**Paclitaxel/IR1061-co-loaded protein nanoparticle for tumor targeted and pH/NIR-II triggered synergistic photothermal-chemotherapy**

Li He†,1, Fangzhen Qing†,2, Maode Li3, Daitian Lan*,3

1 Department of Thyroid and Breast Surgery, Sichuan Academy of Medical Sciences & Sichuan Provincial People’s Hospital (East Hospital), Chengdu 610100, Sichuan, China

2 Department of Stomatology, Sichuan Academy of Medical Sciences & Sichuan Provincial People’s Hospital (East Hospital), Chengdu 610100, Sichuan, China

3 Department of Hepatobiliary and Pancreatic Surgery, Sichuan Academy of Medical Sciences & Sichuan Provincial People’s Hospital (East Hospital), Chengdu 610100, Sichuan, China

*Correspondence: Daitian Lan

E-mail: doctor_yinl@126.com; Tel: +86-18349176311

Address: Department of Hepatobiliary and Pancreatic Surgery, Sichuan Academy of Medical Sciences & Sichuan Provincial People’s Hospital (East Hospital), Chengdu 610100, Sichuan, China

† These authors contributed equally to this paper.





**Figure S1.** The FTIR spectra of IR-AFN-FA.

**

**

**Figure S2.** The fluorescence spectra of free IR1061 and IR-AFN@PTX-FA in PBS.

**

**

**Figure S3.** Cell uptake ratio of free FITC, IR-AFN@PTX, IR-AFN@PTX-FA + FA, and IR-AFN@PTX-FA on normal human breast cells MDA-kb2.

**
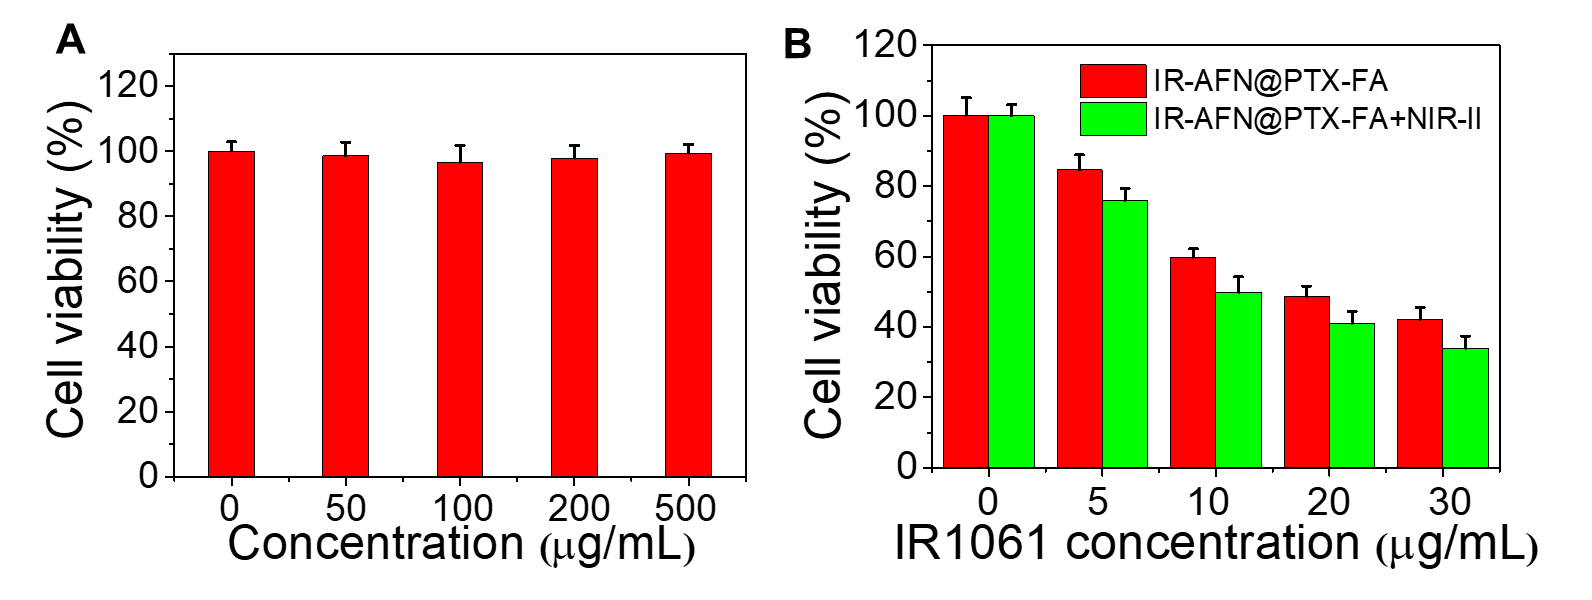
**

**Figure S4.** (A) Cell viability of MDA-kb2 cells treated with various concentrations of IR-AFN-FA. (B) Cell viability of MDA-kb2 cells treated with various concentrations of IR-AFN@PTX-FA with or without NIR-II irradiation (at the same IR1061 concentration).
